# Supplementary material for: Preparative separation and purification of loliolide and epiloliolide from Ascophyllum nodosum using amine-based microporous organic polymer for solid phase extraction coupled with macroporous resin and prep-HPLC
Source: Royal Society of Chemistry journal article supplement (doi:10.1039/d1ay00186h), 2021-01-01
Supplement: d1ay00186h1.pdf [file d1ay00186h1.pdf]

1 Preparative separation and purification of loliolide and  
2 epiloliolide from *Ascophyllum nodosum* using amine-  
3 based microporous organic polymer for solid phase  
4 extraction coupled with macroporous resin and  
5 prep-HPLC

6 Hao Chi,<sup>a</sup> Xia Qi,<sup>a</sup> Xiaohui Wang,<sup>c,d</sup> Ying Wang,<sup>c,d</sup> Xihong Han,<sup>c,d</sup> Jiao Wang<sup>\*b</sup>  
7 and Hongwei Wang<sup>\*a</sup>

8

## 9 Supporting Information

### 10 Summary

11 This supplementary material includes additional results and information as described in the text  
12 of the main article. Including:

### 13 Contents

14 Page S-2: **Figure S1.** The standard curve of loliolide established using UPLC.

15 Page S-3: **Figure S2.** HRESI-MS of loliolide.

16 Page S-4: **Figure S3.** <sup>1</sup>H NMR of loliolide.

17 Page S-5: **Figure S4.** <sup>13</sup>C NMR of loliolide.

18 Page S-6: **Figure S5.** NOSEY of loliolide.

19 Page S-7: **Figure S6.** COSY of loliolide.

20 Page S-8: **Figure S7.** HMBC of loliolide.

21 Page S-9: **Figure S8.** HRESI-MS of epiloliolide.

22 Page S-10: **Figure S9.** <sup>1</sup>H NMR of epiloliolide.

23 Page S-11: **Figure S10.** <sup>13</sup>C NMR of epiloliolide.

24 Page S-12: **Figure S11.** NOSEY of epiloliolide.

25 Page S-13: **Figure S12.** COSY of epiloliolide.

26 Page S-14: **Figure S13.** HMBC of epiloliolide.

27

28 **Figure S1**

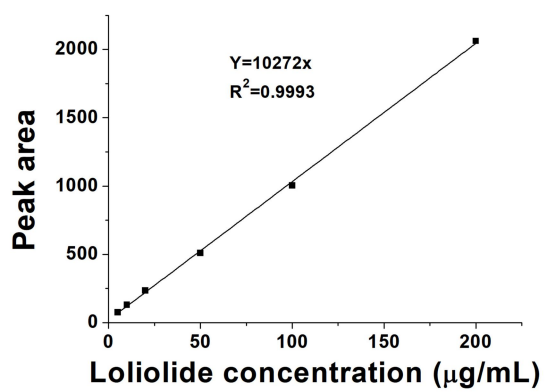

29

30

31 Figure S2

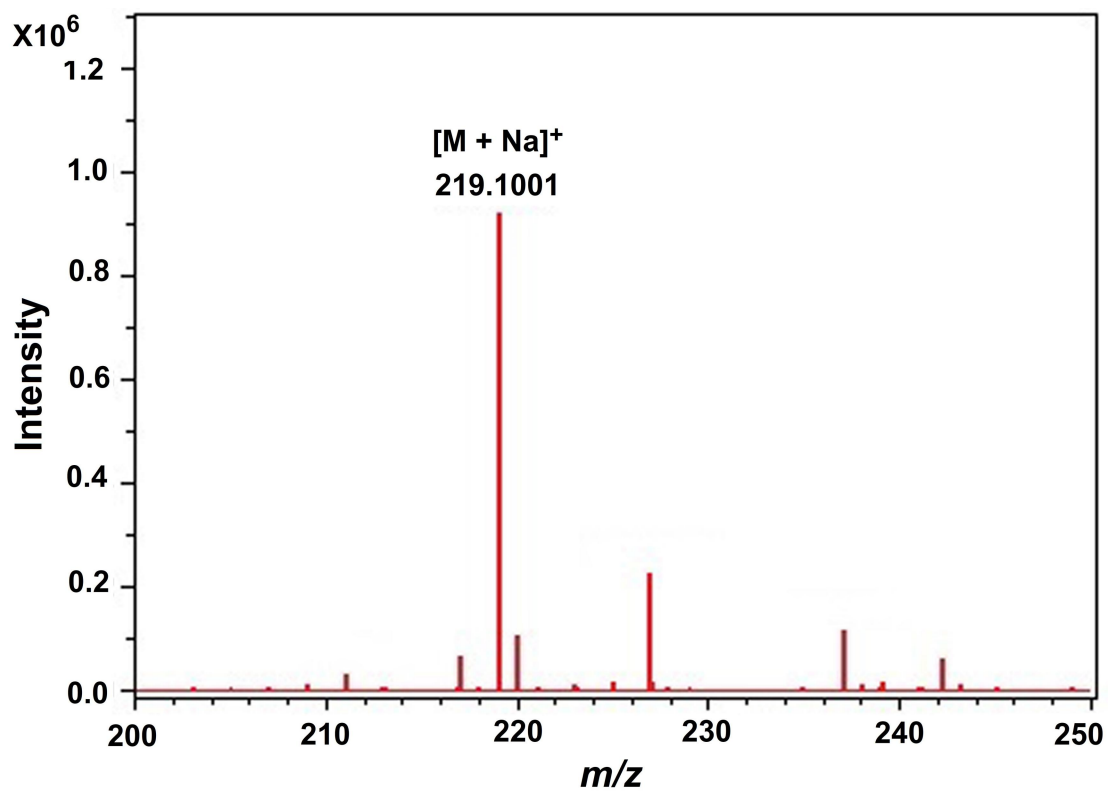

32

33 **Figure S3**

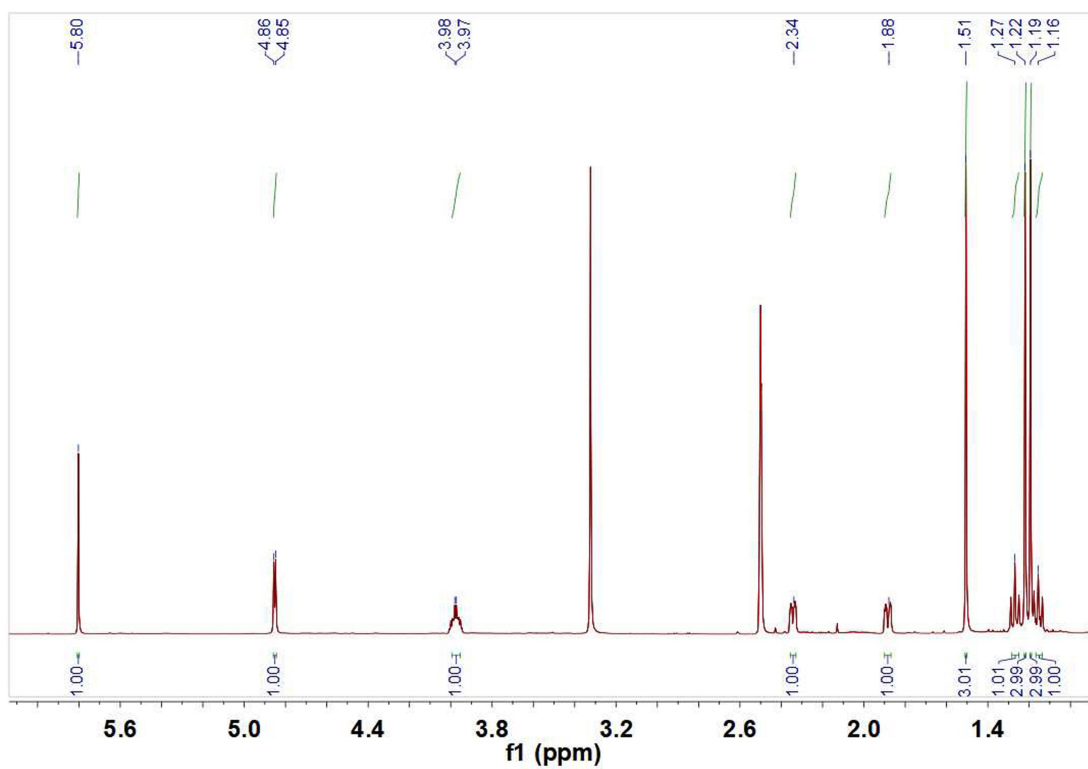

34

35

36 **Figure S4**

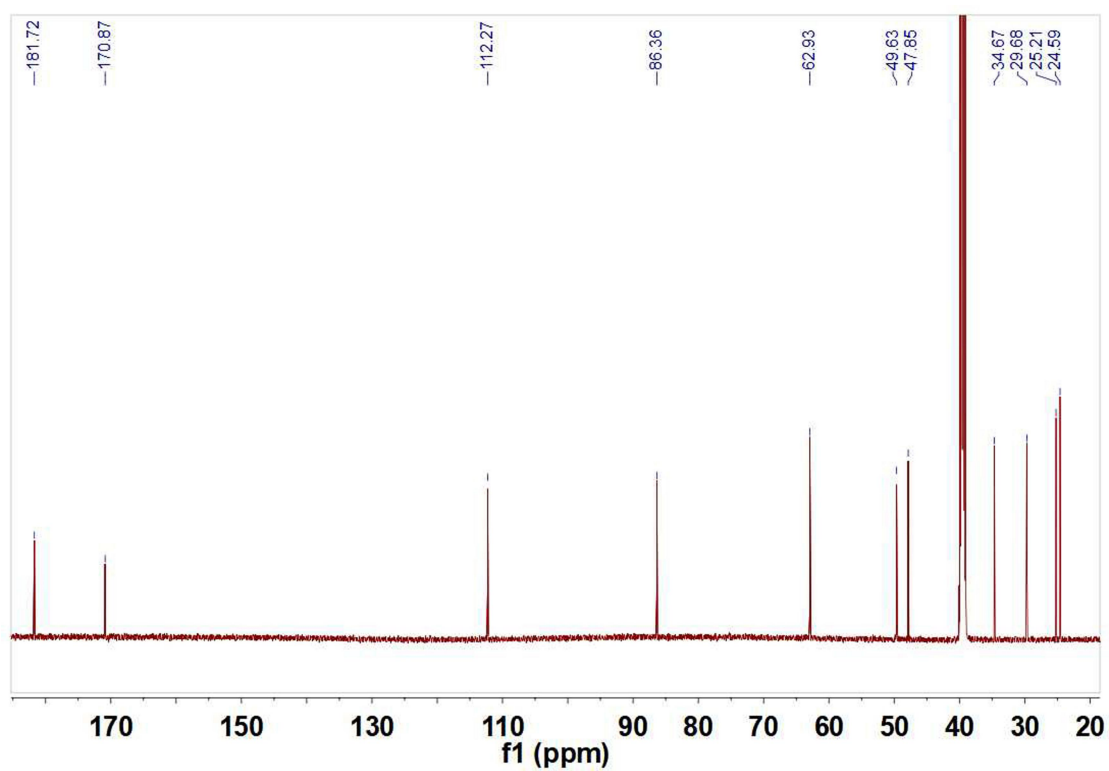

37

38

39 **Figure S5**

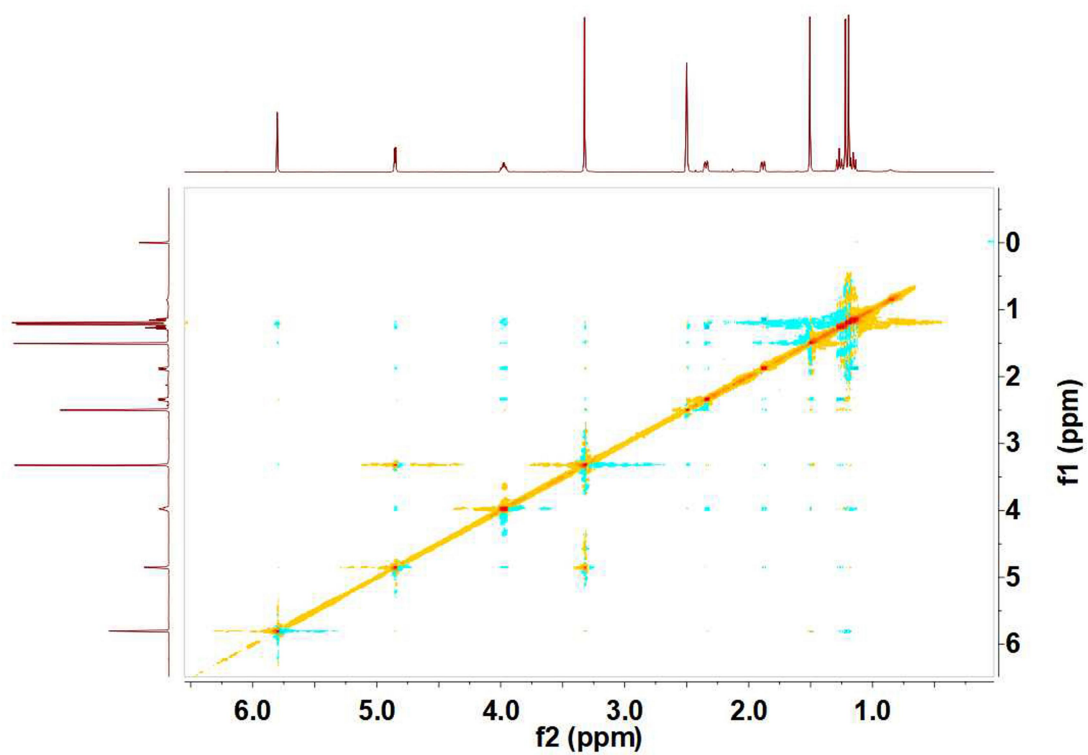

40

41

42 **Figure S6**

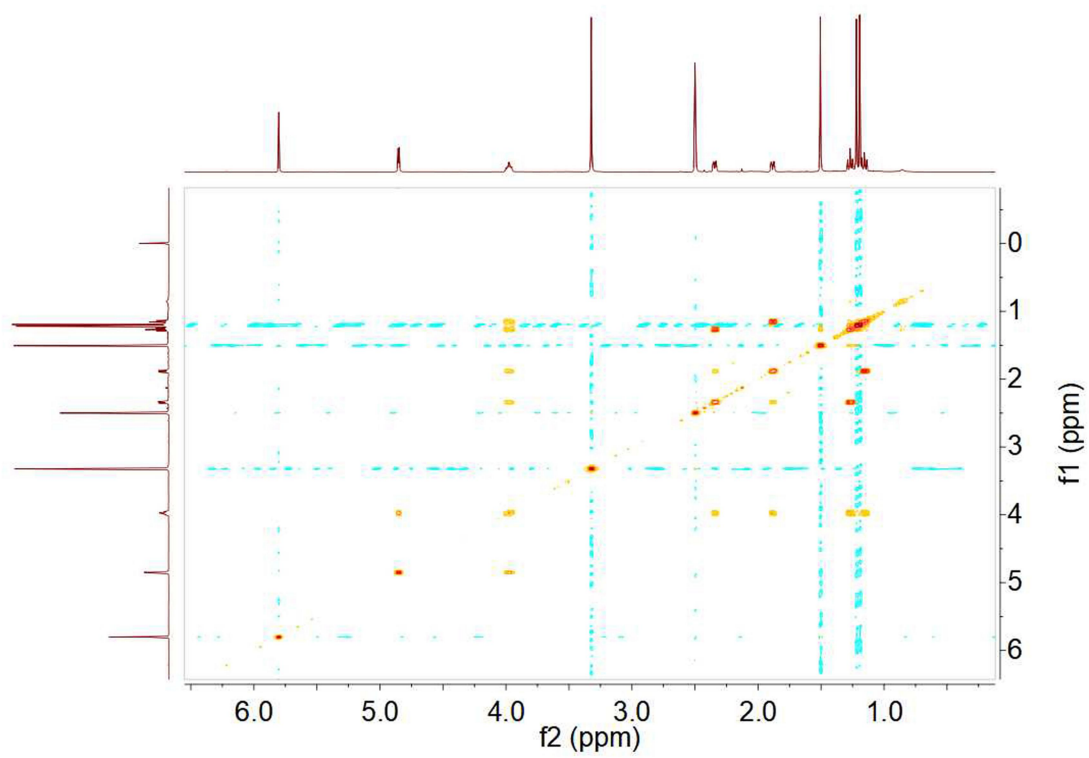

43

44

45 **Figure S7**

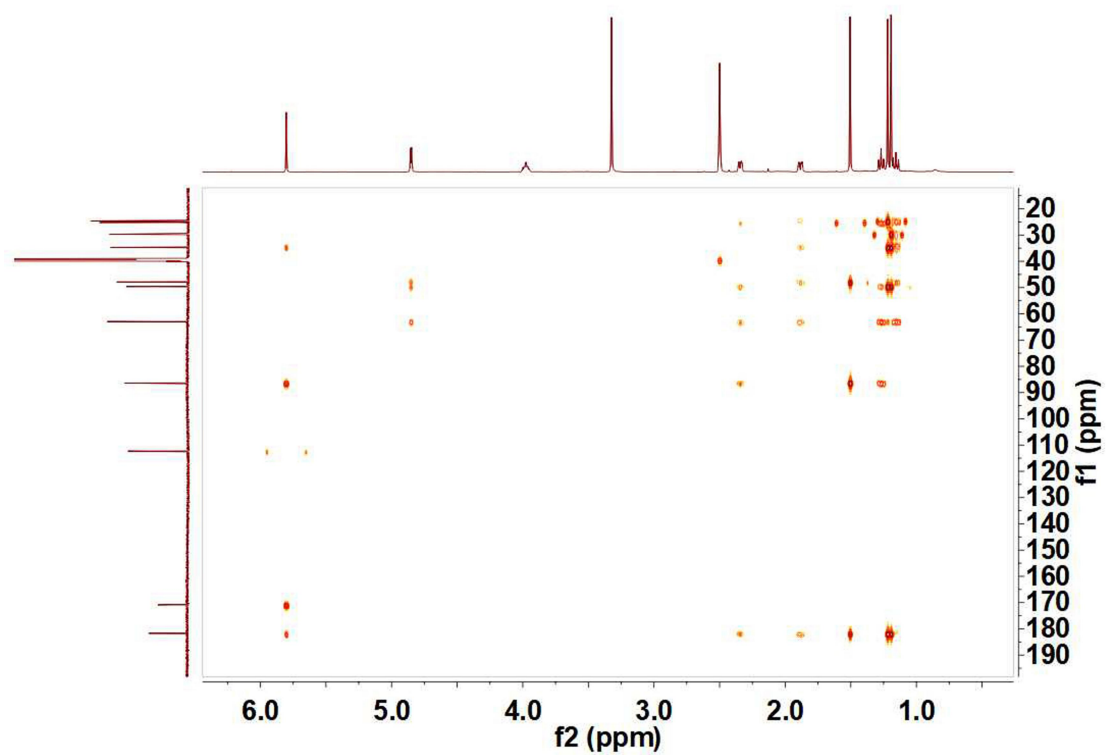

46

47



48 Figure S8

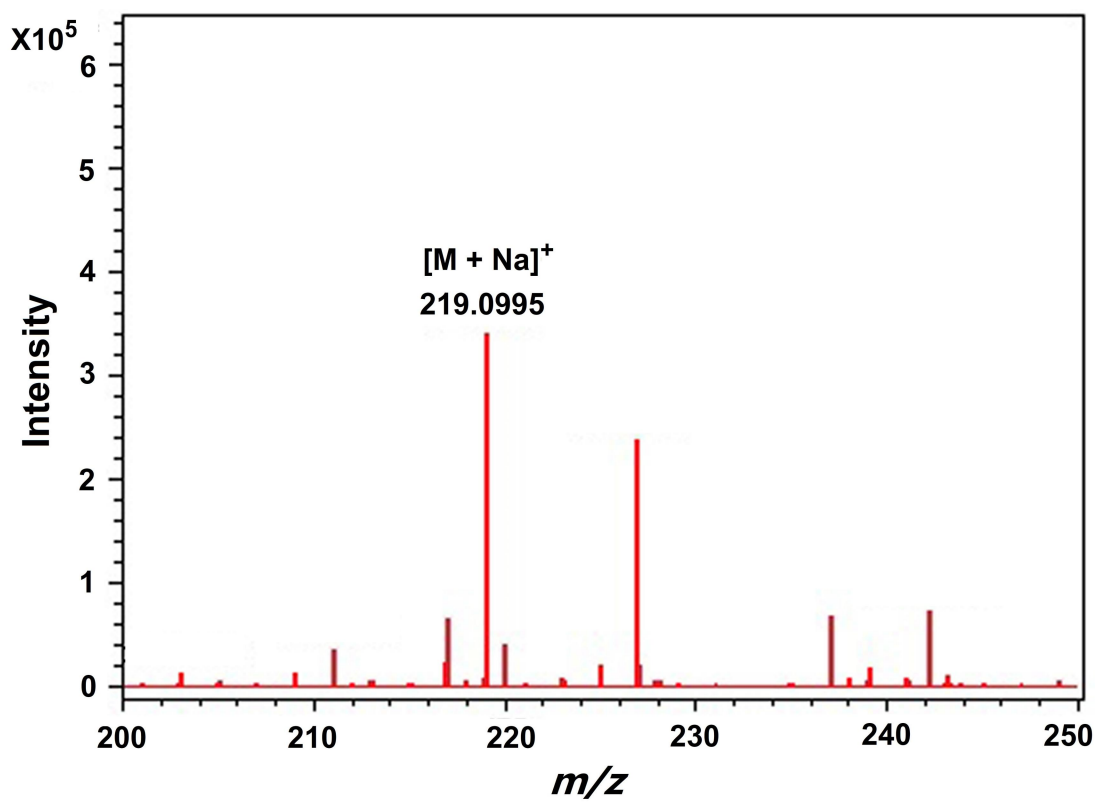

49

50

51 **Figure S9**

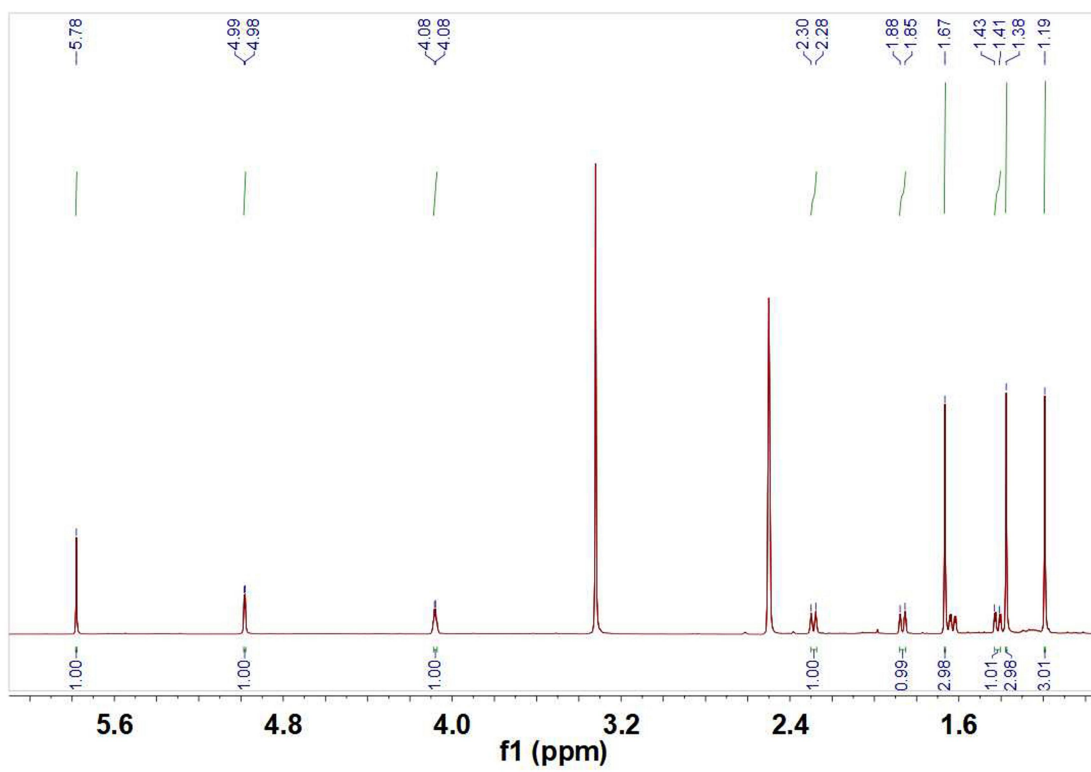

52

53

54 **Figure S10**

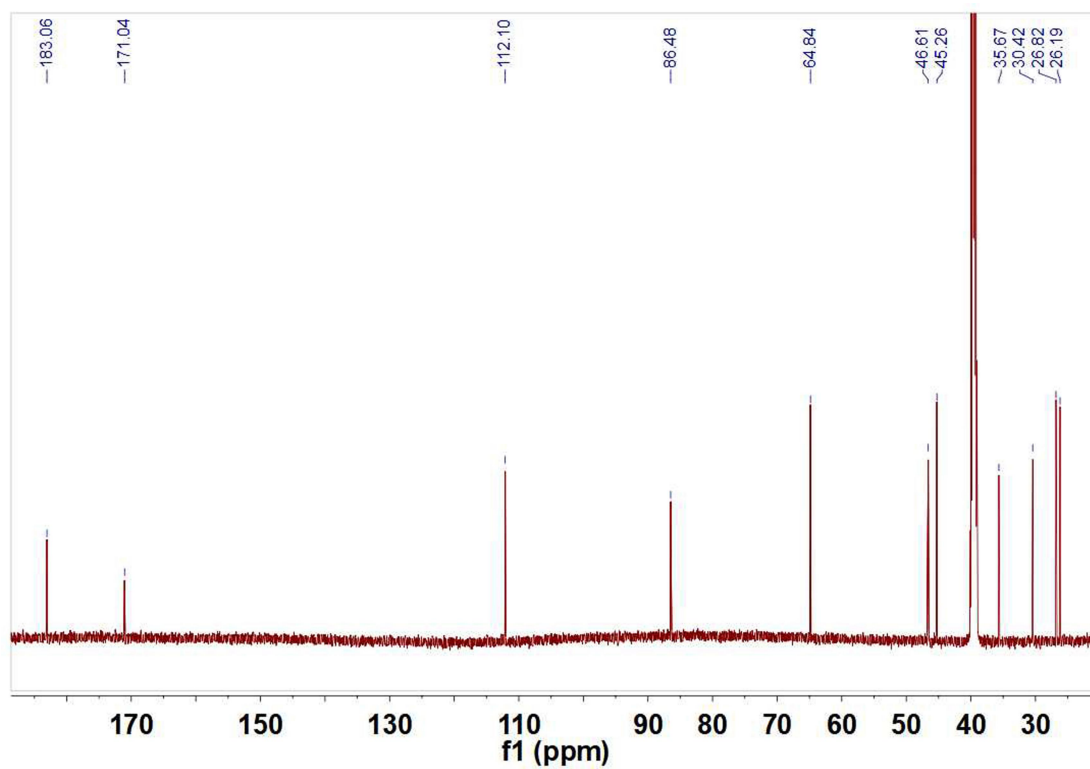

55

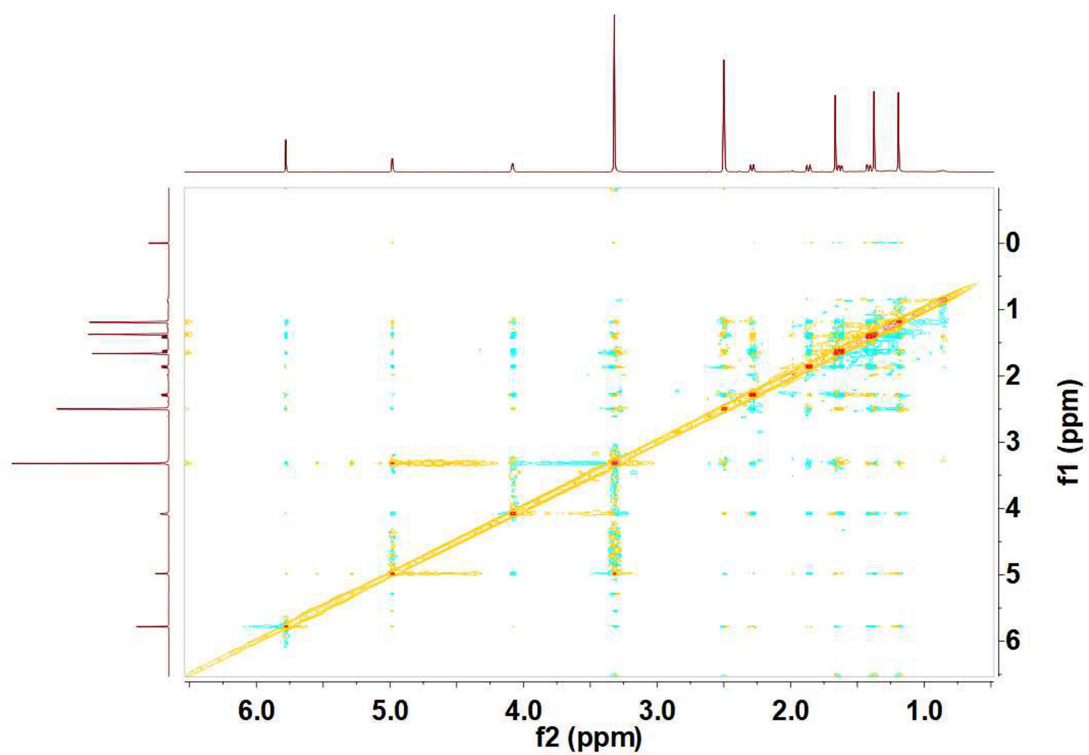

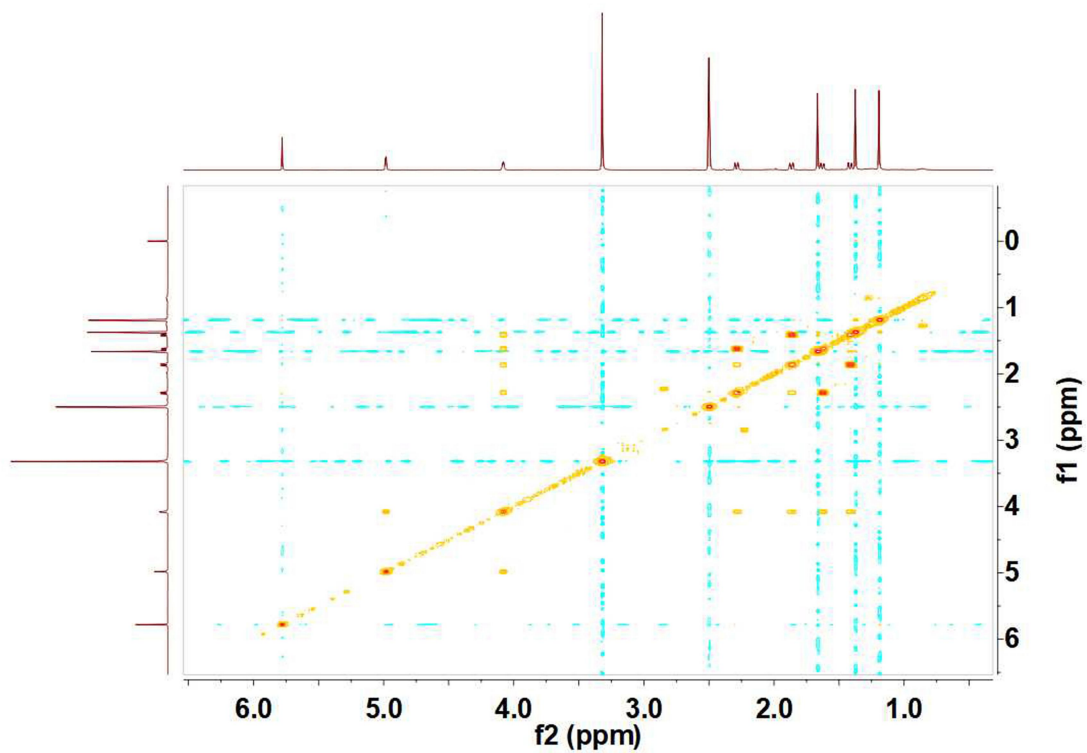

60 **Figure S13**

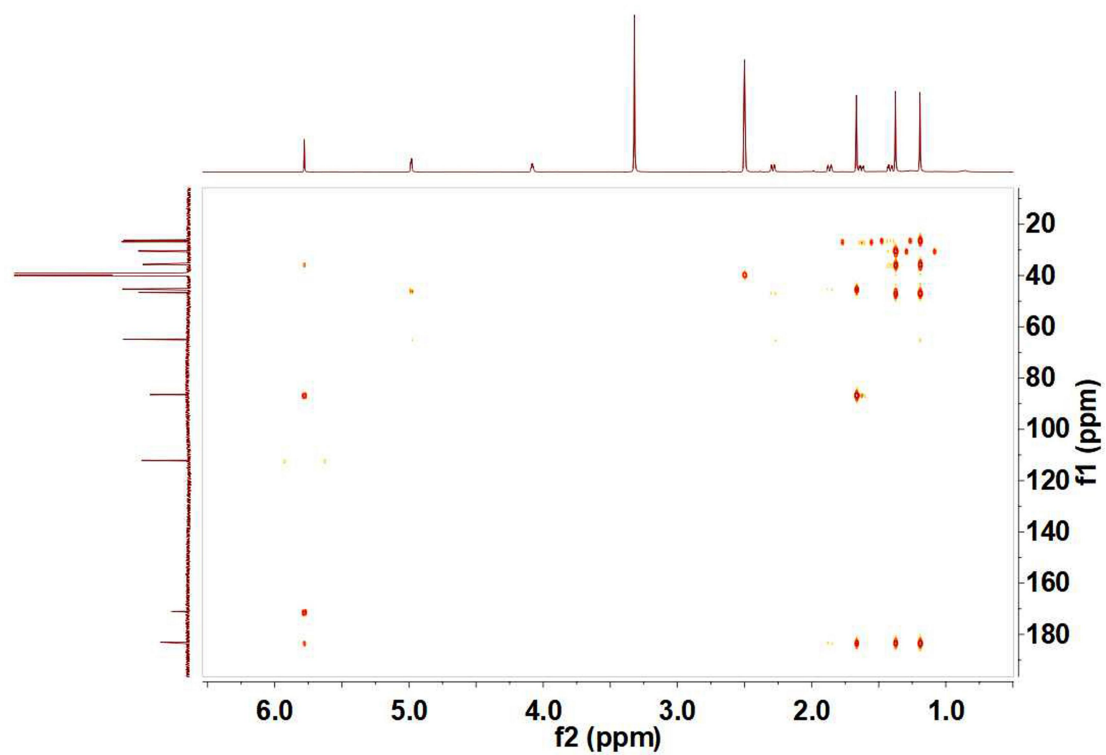

61
